# Supplementary material for: Discovery of novel guanidinophenylpyrazole human acrosin inhibitors by molecular hybridization
Source: Royal Society of Chemistry journal article supplement (doi:10.1039/c4md00160e), 2014-01-01

## Supplementary Material

### Discovery of Novel Guanidinophenylpyrazole Human Acrosin Inhibitors by Molecular Hybridization

Juntao Zhao §, Nannan Sun §, Yue Gao §, Diya Lv, Yang Liu, Yan Jiang, Guoqiang Dong, Qianqian Chen, Wei Li, Youjun Zhou, Ju Zhu, Chunquan Sheng\* and Jiaguo Lv\*

*School of Pharmacy, Second Military Medical University, 325 Guohe Road, Shanghai 200433, China*

§These authors contributed equally to this work.

\* To whom correspondence should be addressed. For C. Q. Sheng: Phone/Fax, 86-21-81871239, E-mail, shengcq@hotmail.com. For J. G. Lv: /Fax, 86-21-81870234, E-mail, ljg19580808@163.com.

# Original spectra of the key compound F3

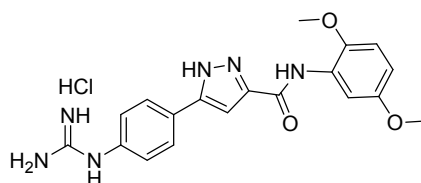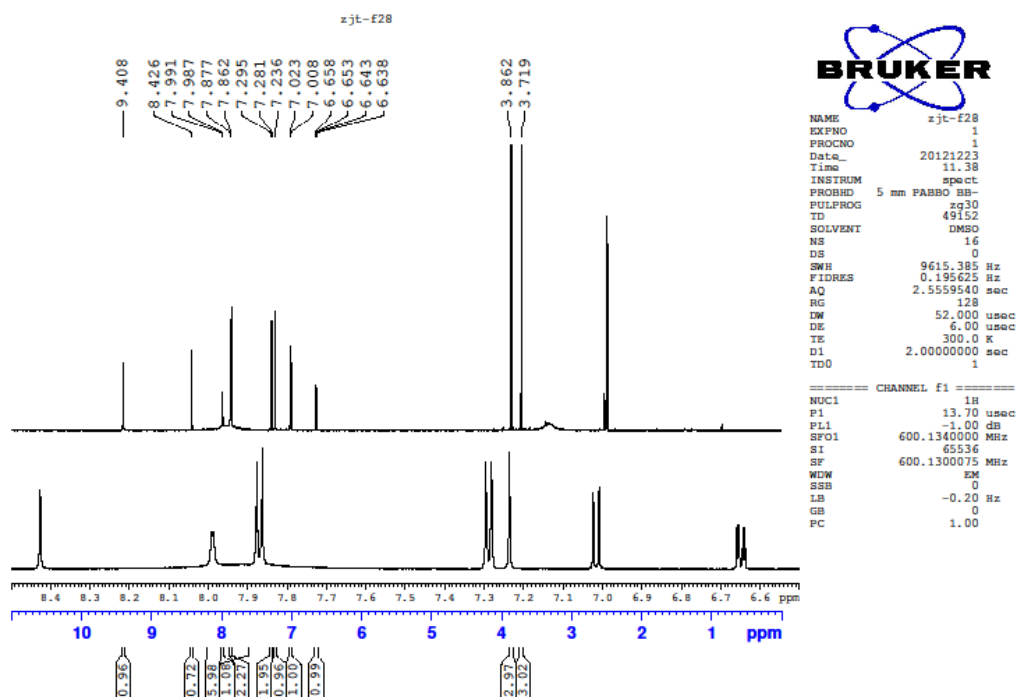

ZJT-03 #5 RT: 0.14 AV: 1 NL: 1.57E9  
T: + c ESI Full ms [ 50.00-1000.00]

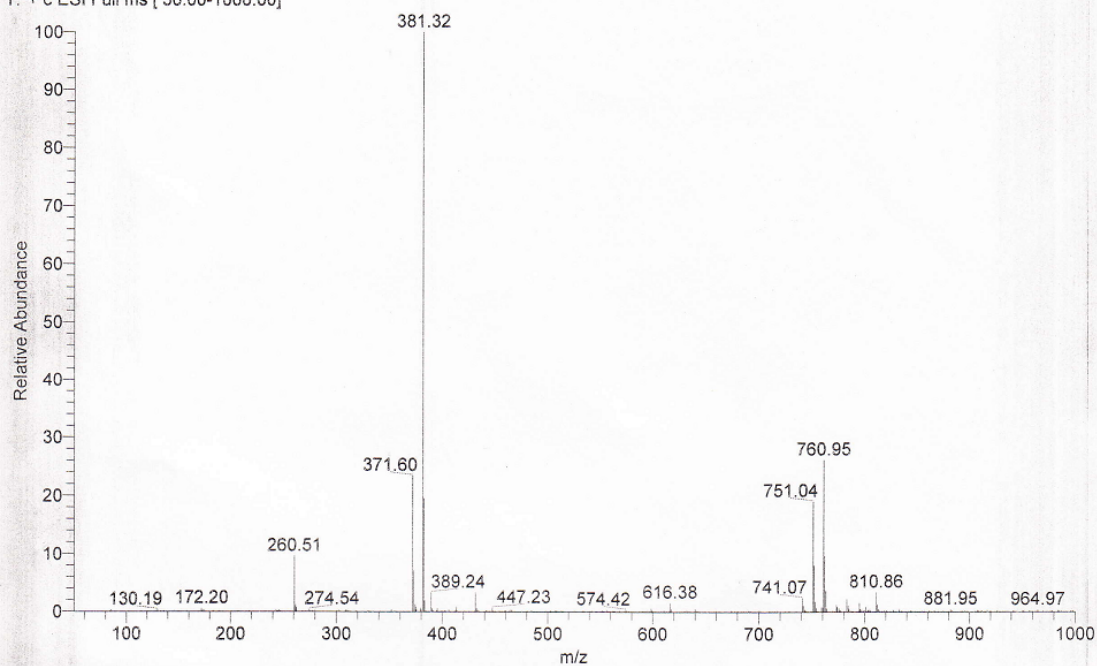

ZJT-03 #6 RT: 0.17 AV: 1 NL: 1.91E7  
F: - c ESI Full ms [ 50.00-1000.00]

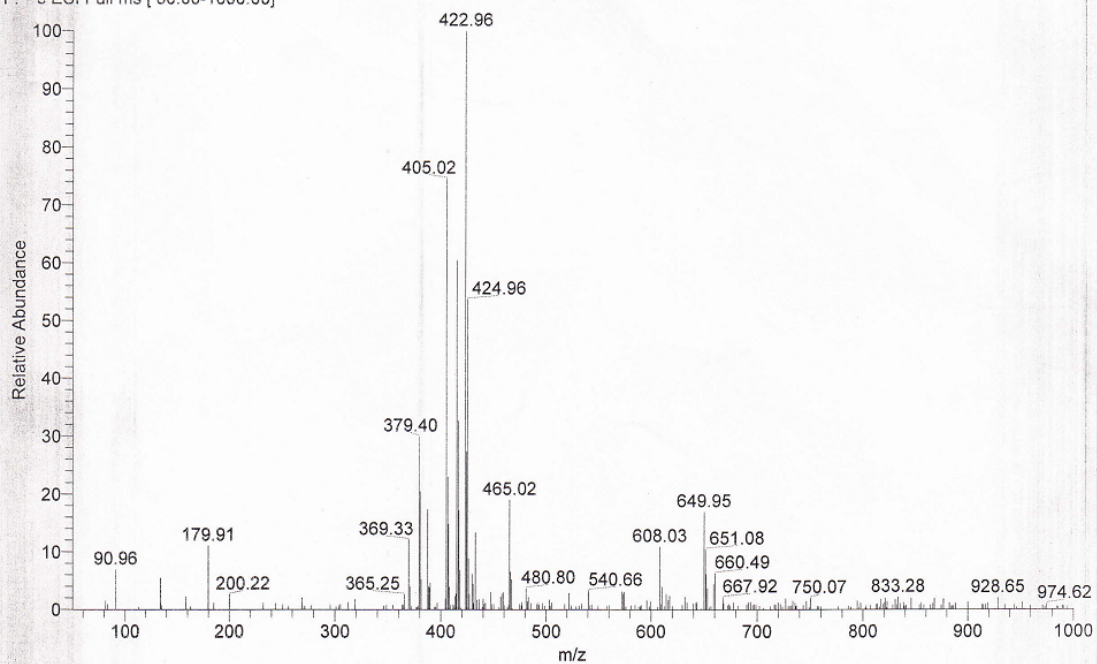

Supplement: c4md00160e1.pdf [file c4md00160e1.pdf]
